# Supplementary material for: Prototype Nerve-Specific Near-Infrared Fluorophores
Source: PubMed Central journal article supplement — Theranostics. 2014 Jun 7;4(8):823–33. doi: 10.7150/thno.8696 (PMC4063980; doi:10.7150/thno.8696), 2014-06-07
Supplement: thnov04p0823s1.pdf [file thnov04p0823s1.pdf]

## Supplementary Materials for

### Prototype Nerve-Specific Near-Infrared Fluorophores

Min Ho Park<sup>1,2\*</sup>, Hoon Hyun<sup>1\*</sup>, Yoshitomo Ashitate<sup>1,3</sup>, Hideyuki Wada<sup>1,3</sup>, GwangLi Park<sup>1</sup>, Jeong Heon Lee<sup>1</sup>, Costyl Njiojb<sup>4</sup>, Maged Henary<sup>4</sup>, John V. Frangioni<sup>1,5,6</sup>, Hak Soo Choi<sup>1,7</sup>†

\*These authors contributed equally to this work.

<sup>1</sup>Division of Hematology/Oncology, Department of Medicine and <sup>5</sup>Department of Radiology, Beth Israel Deaconess Medical Center, Boston, MA 02215

<sup>2</sup>Department of Surgery, Chonnam National University Medical School, Gwangju 501-746, South Korea

<sup>3</sup>Department of Gastroenterological Surgery II, Hokkaido University Graduate School of Medicine, Sapporo 060-8638, Japan

<sup>4</sup>Department of Chemistry, Georgia State University, Atlanta, GA 30303

<sup>6</sup>Curadel, LLC, 377 Plantation Street, Worcester, MA 01605

<sup>7</sup>Department of Cogno-Mechatronics Engineering, Pusan National University, Busan 609-735, South Korea

†To whom correspondence should be addressed. HSC: [hchoi@bidmc.harvard.edu](mailto:hchoi@bidmc.harvard.edu)

The PDF file includes:

#### Supplementary Methods

**Figure S1.** Optical Properties of Nerve-Targeting Fluorophores.

**Figure S2.** *Ex Vivo* Screening Assay of Fluorophores for Nerve-Specificity.

**Figure S3.** *In Vivo* Biodistribution and Clearance of Nerve-Specific Fluorophores.

**Figure S4.** *In Vivo* Dose-Dependent Brain and Central Nervous Tissue Uptake of Oxazine 4 in Mice.

**Figure S5.** Chemical Similarity Calculated by Comparing Fluorophores with Positive Nerve Binding Fingerprints.

## SUPPLEMENTARY METHODS

**Optical Property Measurements:** All optical measurements were performed at 37°C in phosphate-buffered saline (PBS), pH 7.4, 100% fetal bovine serum (FBS) buffered with 50 mM HEPES, pH 7.4, methanol (MeOH), or dimethyl sulfoxide (DMSO). Absorbance and fluorescence emission spectra of the series of NIR fluorophores were measured using fiber optic HR2000 absorbance (200–1100 nm) and USB2000FL fluorescence (350–1000 nm) spectrometers (Ocean Optics, Dunedin, FL). Excitation light was provided by a 532 nm green laser pointer (Opcom Inc., Xiamen, China) set to 5 mW and coupled through a 300 µm core diameter, NA 0.22 fiber (Fiberguide Industries, Stirling, NJ). *In silico* calculation of the partition coefficient (logD at pH 7.4) was calculated using Marvin and J Chem calculator plugins (ChemAxon, Budapest, Hungary).

***In Vivo* Nerve-Specificity Screening:** Sprague-Dawley (SD) male rats weighing 250-300 g were purchased from Charles River Laboratories (Wilmington, MA). BMB, Oxazine 1, Oxazine 4, Oxazine 170, Oxazine 750, and Rhodamine 800 were initially screened to investigate nerve specificity in rats. For the initial screening, we administered a relatively high dose (2 mg/kg; 1 µmol) of each fluorophore intravenously. 4 h after injection, brachial plexus (BP) and sciatic nerve (SN) were imaged using the intraoperative FLARE™ system for *in vivo* nerve-specific fluorophores screening.

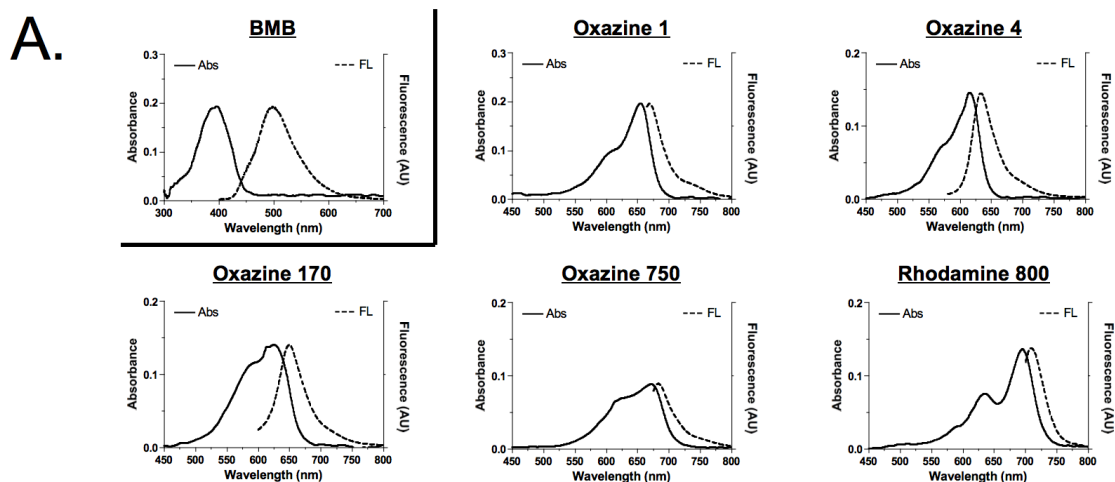

**B.**

Optical Properties of Oxazine 4 in Various Solvents.

| Solvent | Extinction Coefficient<br>( $M^{-1}cm^{-1}$ ) | Peak Absorbance<br>(nm) | Peak Emission<br>(nm) | Stokes Shift<br>(nm) |
|---------|-----------------------------------------------|-------------------------|-----------------------|----------------------|
| PBS     | 143,000                                       | 616                     | 634                   | 17                   |
| FBS     | 143,000                                       | 616                     | 635                   | 17                   |
| MeOH    | 182,000                                       | 611                     | 631                   | 20                   |
| DMSO    | 147,000                                       | 621                     | 640                   | 19                   |

DMSO = dimethyl sulfoxide; FBS = fetal bovine serum supplemented with 50 mM HEPES, pH 7.4; MeOH = methanol; PBS = phosphate buffered saline, pH 7.4.

**Figure S1.** A) Optical Properties of Nerve-Targeting Fluorophores. Absorbance and fluorescence spectra were obtained at a concentration of 1  $\mu M$  in 100% FBS supplemented with 50 mM HEPES, pH 7.4. B) Optical properties of Oxazine 4 were measured in PBS (pH 7.4), FBS (pH 7.4), MeOH, and DMSO.

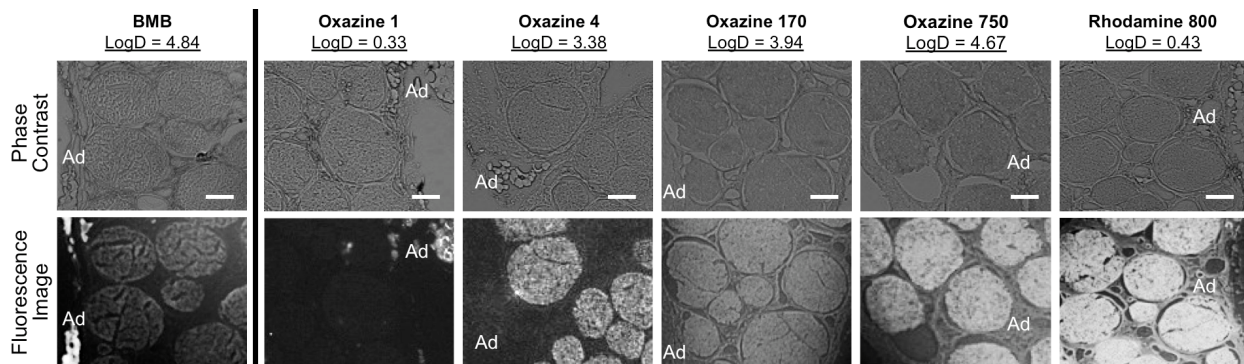

**Figure S2.** *Ex Vivo* Screening Assay of Fluorophores for Nerve-Specificity. Nerve-specific fluorescence intensity was determined using staining of pig sciatic nerve cut in cross section and incubated with 100  $\mu M$  of each fluorophore. Ad = adipose tissue. Scale bars = 100  $\mu m$ . The partition coefficient ( $\log D$  at pH 7.4) was calculated using JChem calculator plugins.

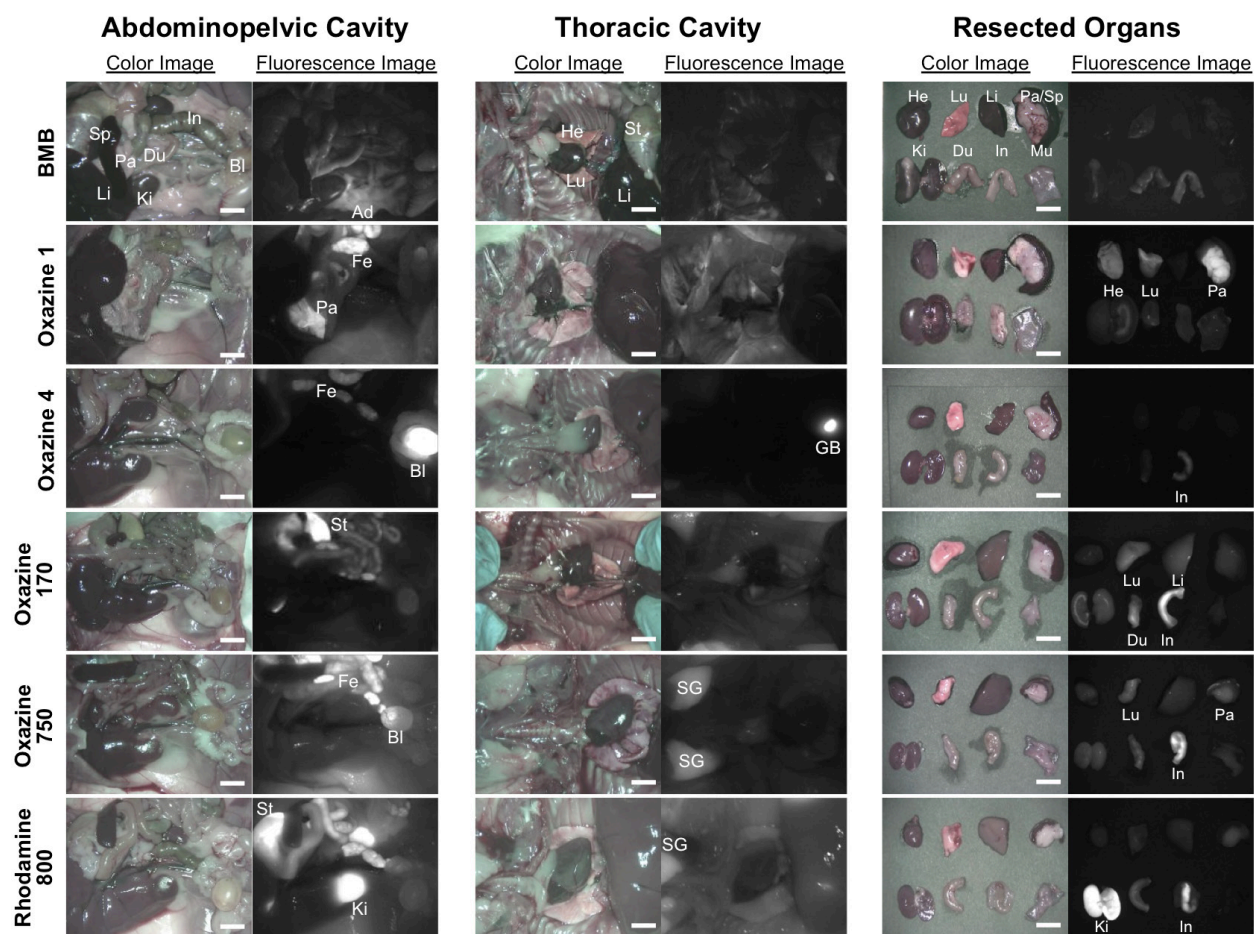

**Figure S3.** *In Vivo* Biodistribution and Clearance of Nerve-Specific Fluorophores. All fluorophores used in *ex vivo* screening were tested into SD rats for *in vivo* tracking biodistribution 4 h post-injection. Among nerve highlighting fluorophores (BMB, Oxazine 4, and Oxazine 170), Oxazine 4 showed higher nerve-specific fluorescence signal and lower background (muscle and adipose tissue) fluorescence signal than Oxazine 170 and BMB. Abbreviations used are: Ad, adipose; Bl, bladder; Du, duodenum; Fe, feces; GB; gallbladder; He, Heart; In, intestine; Ki, kidneys; Li, liver; Lu, lungs; Mu, muscle; Pa, pancreas; Sp, spleen; St, stomach; and SG, salivary gland. Scale bars = 1 cm. All NIR fluorescence images have identical exposure and normalizations.



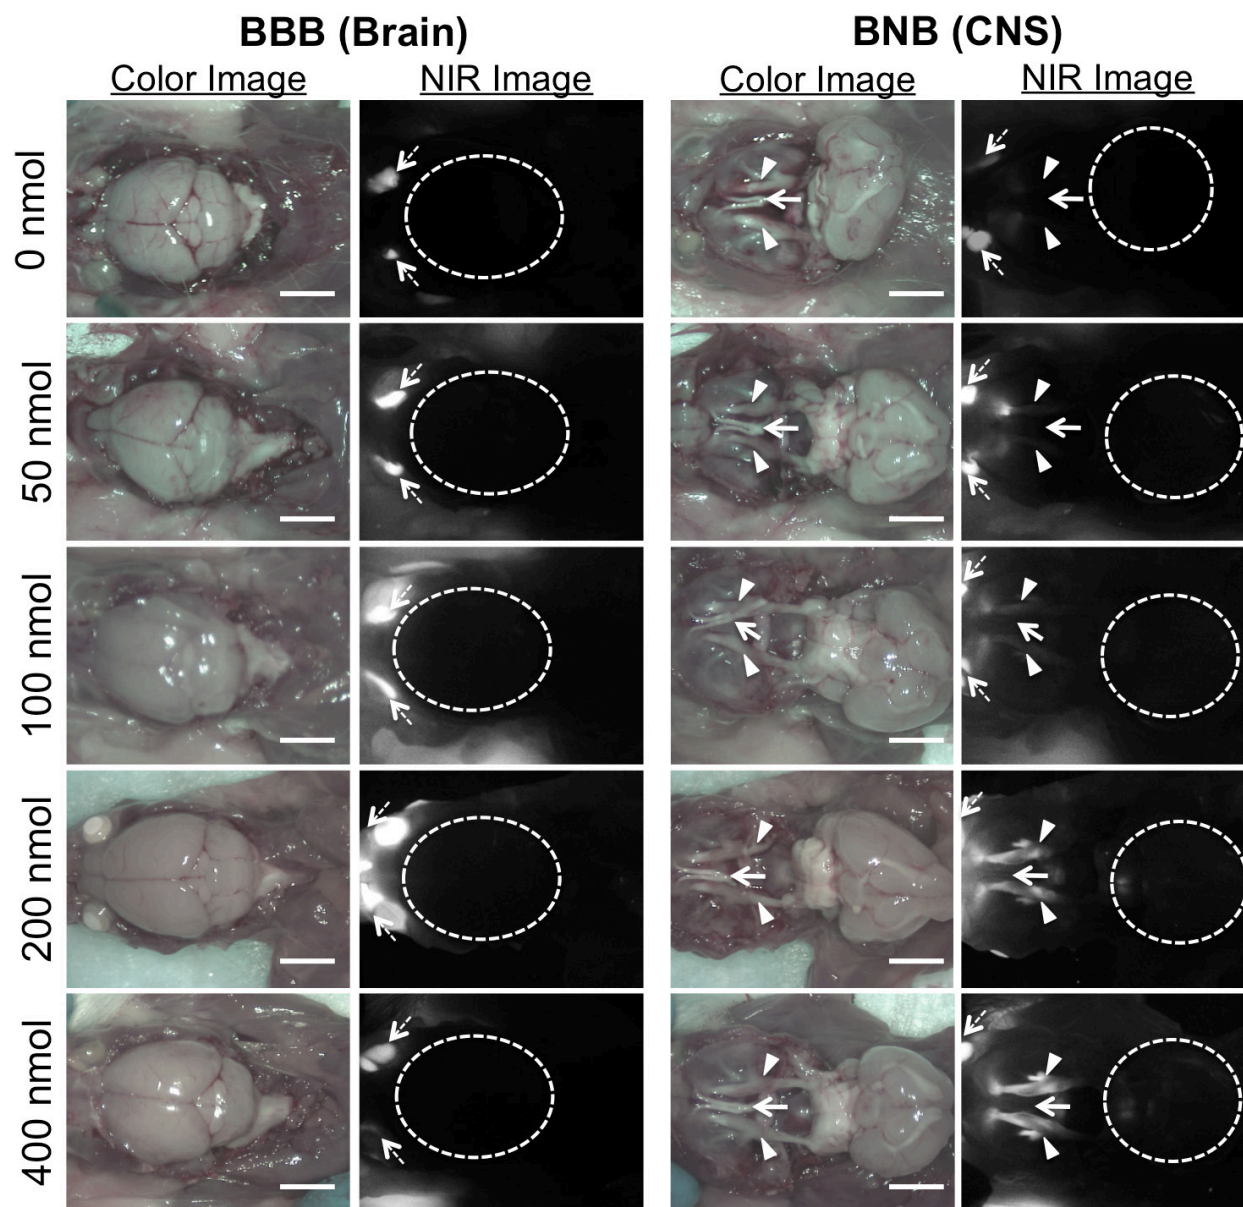

**Figure S4.** *In Vivo* Dose-Dependent Brain and Central Nerve Uptake of Oxazine 4 in Mice. 0, 50, 100, 200, and 400 nmol of Oxazine 4 were injected intravenously into CD-1 mice, and BBB (brain-blood barrier) and BNB (blood-nerve-barrier) uptake at CNS (central nervous system) was imaged at 4 h post-injection. Dotted arrows indicate Harderian glands (autofluorescence from porphyrins) and dotted circles indicate intact brain shown from the top. Arrowheads indicate trigeminal ganglia (peripheral nerves) and solid arrows indicate optic nerves (central nerves). Images are representative of N = 5 independent experiments. Scale bars = 0.5 cm. All NIR fluorescence images have identical exposure times (500 msec) and normalizations.

|             |             |             |             |             |
|-------------|-------------|-------------|-------------|-------------|
|             |             |             |             |             |
| BMB 0.375   | BMB 0.356   | BMB 0.565   | BMB 0.356   | BMB 0.382   |
|             |             |             |             |             |
| Ox4 0.133   | Ox170 0.154 | Rh800 0.177 | Ox4 0.129   | Ox4 0.138   |
|             |             |             |             |             |
| Ox170 0.129 | Ox4 0.139   | Ox4 0.137   | Ox170 0.125 | Ox170 0.134 |
|             |             |             |             |             |
| Rh800 0.122 | Ox750 0.134 | Ox170 0.133 | Rh800 0.119 | Rh800 0.121 |
|             |             |             |             |             |
| Ox750 0.110 | Rh800 0.126 | Ox750 0.128 | Ox750 0.107 | Ox750 0.114 |
|             |             |             |             |             |
| Ox1 0.104   | Ox1 0.110   | Ox1 0.097   | Ox1 0.099   | Ox1 0.110   |

**Figure S5.** Chemical Similarity Calculated by Comparing Fluorophores to Positive Nerve Binding Fingerprints Proposed by Gibbs et al. (*PLoS One* 2013; 8, e73493). Based on the QSAR screening and fingerprinting, Oxazine 4 fits with the previously proposed basic requirement of a balanced para-configuration of the core. In addition, Oxazine 4 shows the highest similarity with the five highest ranked fingerprints except for BMB. Although Oxazine 170 and Rhodamine 800 show relatively high similarities, the former is rather lipophilic ( $\log D$  at pH 7.4 = 3.94) and the latter is rather hydrophilic ( $\log D$  at pH 7.4 = 0.43), which resulted in high accumulation in adipose tissue or low targeting affinity to the nerve, respectively.
